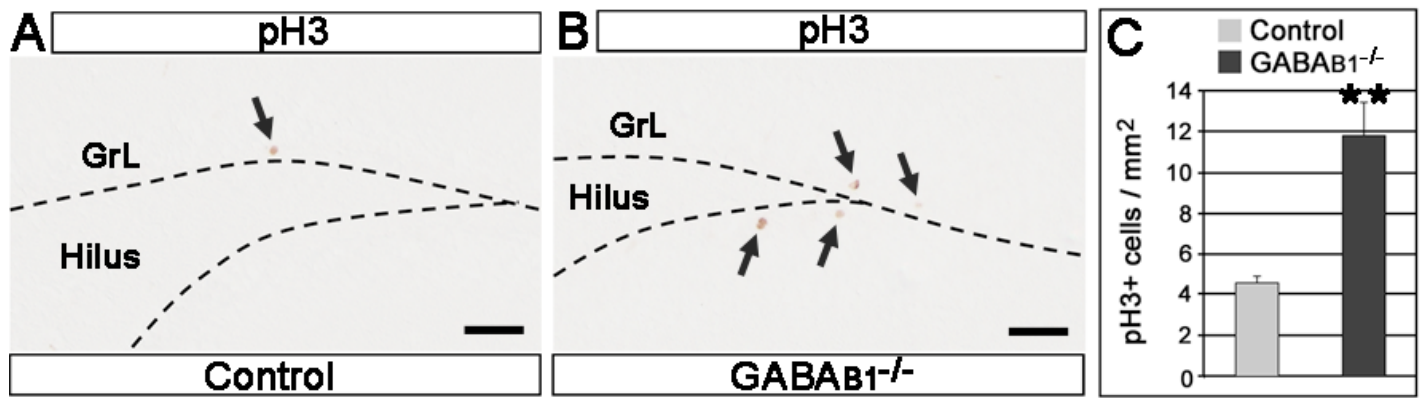

**Fig. S1. Increased proliferation in the hippocampus of GABA<sub>B1</sub> deficient mice.** (A, B) Representative images of mitotic pH3<sup>+</sup> cells in GABA<sub>B1</sub><sup>-/-</sup> and wild-type control mice. (C) The density of pH3<sup>+</sup> cells is increased in mutant mice (control 4.7±0.22; GABA<sub>B1</sub><sup>-/-</sup> 11.8±1.8; n=8). GrL, granule cell layer. t-test: \*\*p<0.01. Error bars indicate SEM. Scale bars, 50 μm

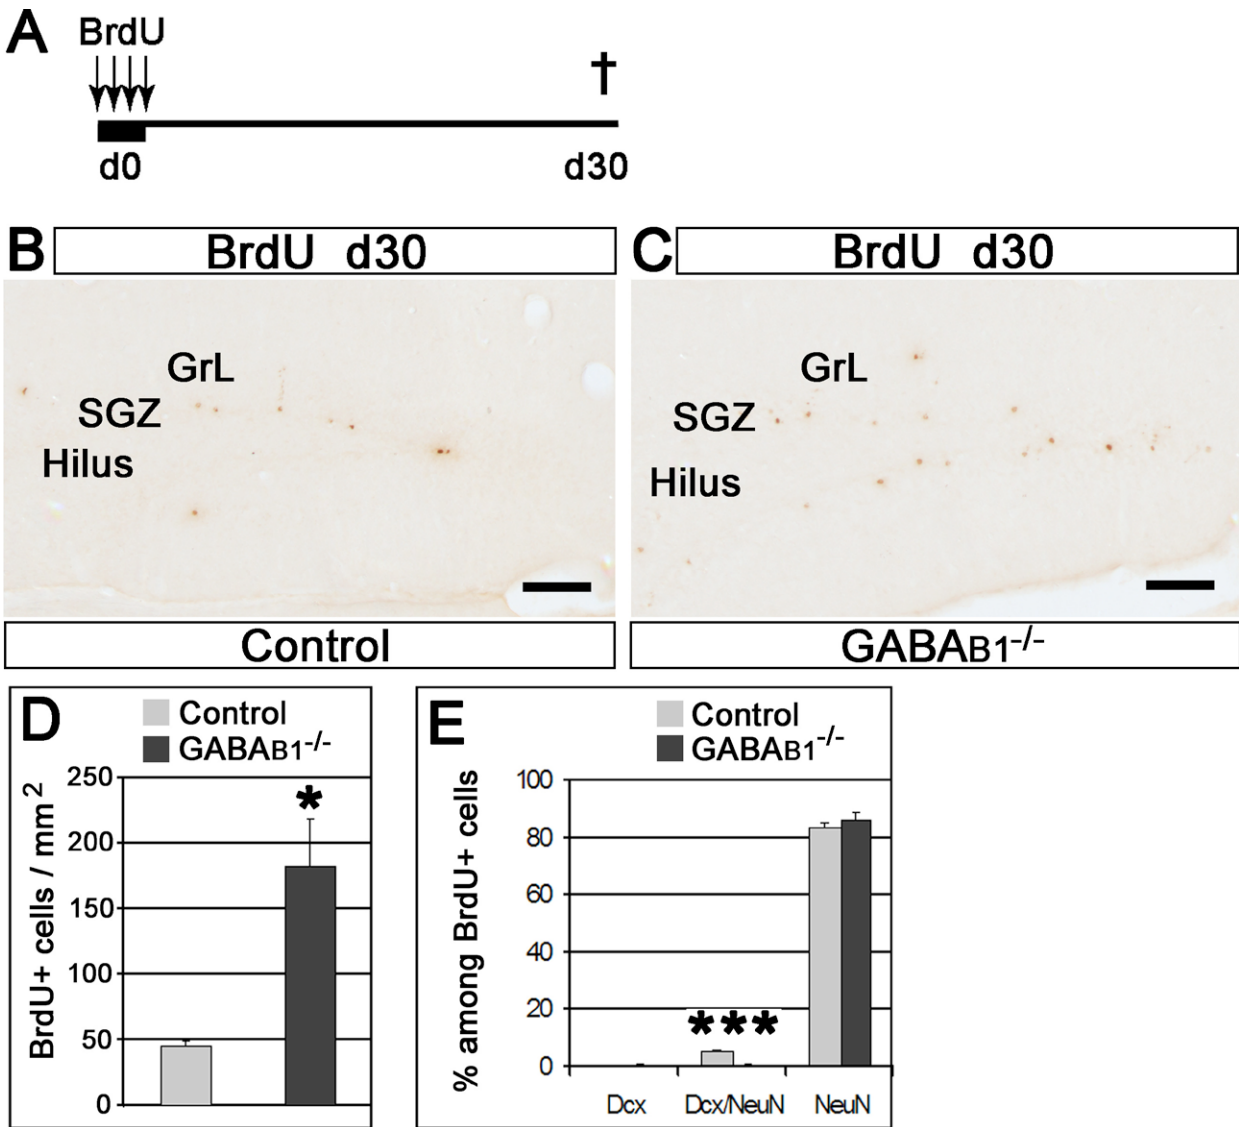

**Fig. S2. Increased neurogenesis in the hippocampus of GABA<sub>B1</sub> deficient mice.** (A) BrdU was injected intraperitoneally four times a day 0 (d0) to label newly generated cells and the mice were killed (†) 30 days later (d30). (B, C) Representative images of BrdU<sup>+</sup> newly generated cells in the adult hippocampus of GABA<sub>B1</sub><sup>-/-</sup> and control mice at day 30. (D) The density of long-term surviving BrdU<sup>+</sup> newborn cells is increased 4-fold in GABA<sub>B1</sub> mutant mice (control 46±3.2; GABA<sub>B1</sub><sup>-/-</sup> 183±36; n=5). (E) Thirty days after BrdU injection, most labeled-newborn cells terminally differentiated into NeuN<sup>+</sup> neurons. A few BrdU<sup>+</sup> cells still expressed Dcx in control, but not in GABA<sub>B1</sub> mutant mice (control 5.2±0.49; GABA<sub>B1</sub><sup>-/-</sup> 0.55±0.6; n=5). SGZ, subgranular zone; GrL, granule cell layer. t-test: \*p<0.05, \*\*\*p<0.001. Error bars indicate SEM. Scale bars, 100 μm.

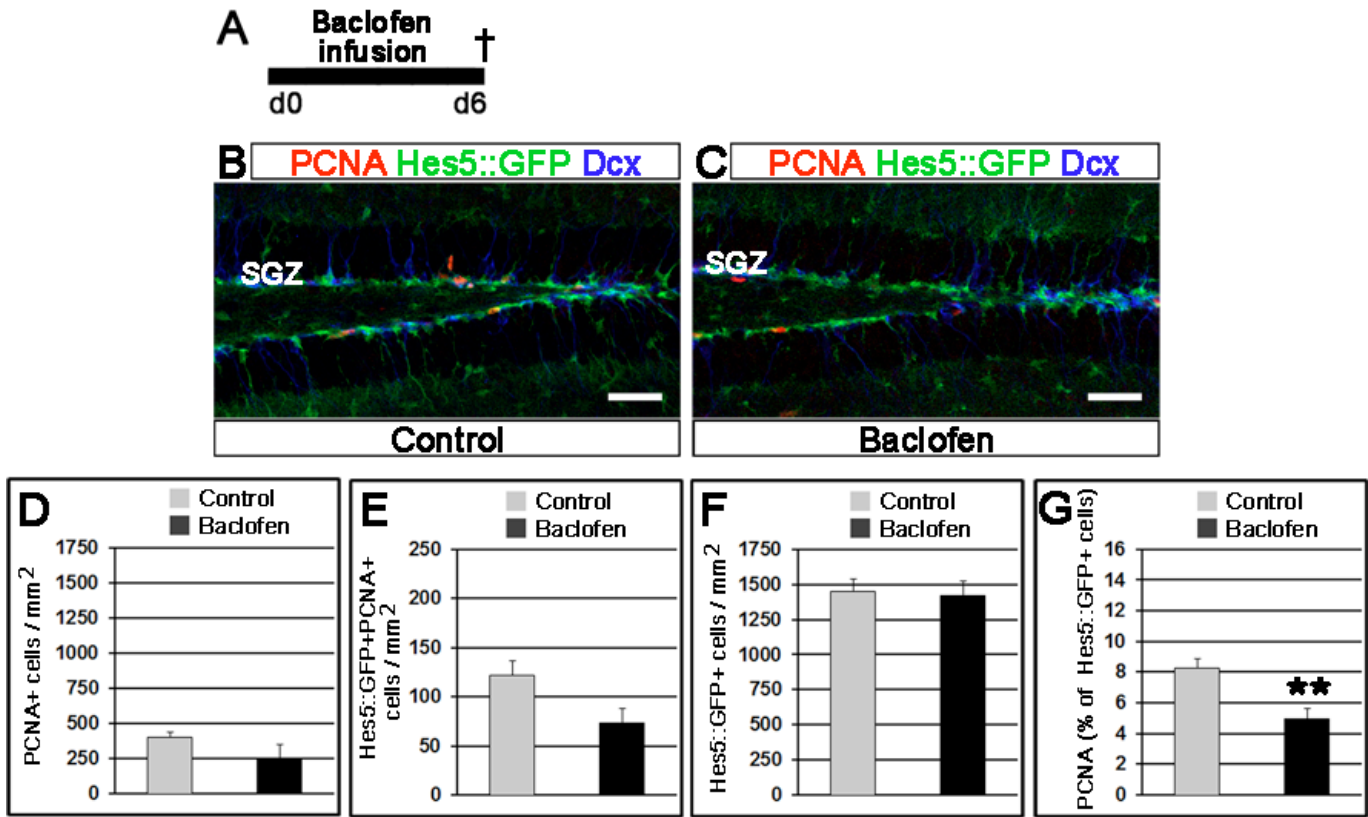

**Fig. S3. Infusion of GABA<sub>B</sub> agonist inhibits adult hippocampal NSC proliferation.** (A) GABA<sub>B</sub> agonist induction regime. Baclofen was infused for six days into the hippocampus of adult *Hes5::GFP*<sup>+</sup> mice. The mice were killed (†) at day 6 (d6). (B, C) Representative images of proliferating cells (PCNA<sup>+</sup>), neuroblasts (Dcx<sup>+</sup>) and NSCs (*Hes5::GFP*<sup>+</sup>) in the SGZ of Baclofen and control (saline) infused mice. (D) The density of PCNA<sup>+</sup> proliferating cells is not significantly changed in Baclofen-treated mice (control 398±37; CGP 255±94; n=5). (E) The density of proliferating (PCNA<sup>+</sup>) *Hes5::GFP*<sup>+</sup> cells is slightly but not significantly decreased in Baclofen treated mice (control 121±15; Baclofen 73±16; n=5; p=0.057). (F) The *Hes5::GFP*<sup>+</sup> population does not change in size after Baclofen treatment (control 1451±87; Baclofen 1418±105; n=5). (G) The proportion of *Hes5::GFP*<sup>+</sup> cells that proliferate (PCNA<sup>+</sup>) decreases after Baclofen treatment (control 8.2±0.6; Baclofen 4.9±0.7; n=5). SGZ, subgranular zone. t-test: \*\*p<0.01. Error bars indicate SEM. Scale bars, 50 μm.
